# Supplementary material for: Promotion of TH3 (T = Si and Ge) group transfer within a tetrel bond by a cation–π interaction
Source: Royal Society of Chemistry journal article supplement (doi:10.1039/d1cp05323j), 2021-12-15
Supplement: d1cp05323j1.pdf [file d1cp05323j1.pdf]

## Supporting Information

### Promotion of TH<sub>3</sub> (T=Si and Ge) group transfer within a tetrel bond by a cation- $\pi$ interaction

**Table S1** The particular value of intermolecular distance  $R(\text{C}\cdots\text{C}, \text{\AA})=R_1+R_2$  and energy barrier ( $\Delta E$ , kcal/mol) in  $\text{Be}^{2+}\cdots\text{PhSiH}_3\cdots\text{C}_3\text{N}_2\text{H}_4$  triad

| $R(\text{C}\cdots\text{C})$ | $\Delta E$ |
|-----------------------------|------------|
| 4.6                         | 9.40       |
| 4.7                         | 9.62       |
| 4.8                         | 9.86       |
| 4.9                         | 10.09      |
| 5.0                         | 10.34      |

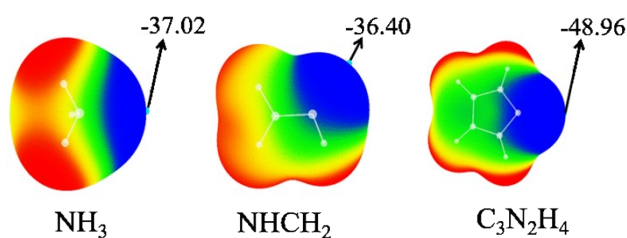

**Figure S1** MEP maps of N-base monomers. Color ranges are: red, greater than 12; yellow, between 12 and zero; green, between zero and -12; blue, less than -12. All are in kcal/mol.

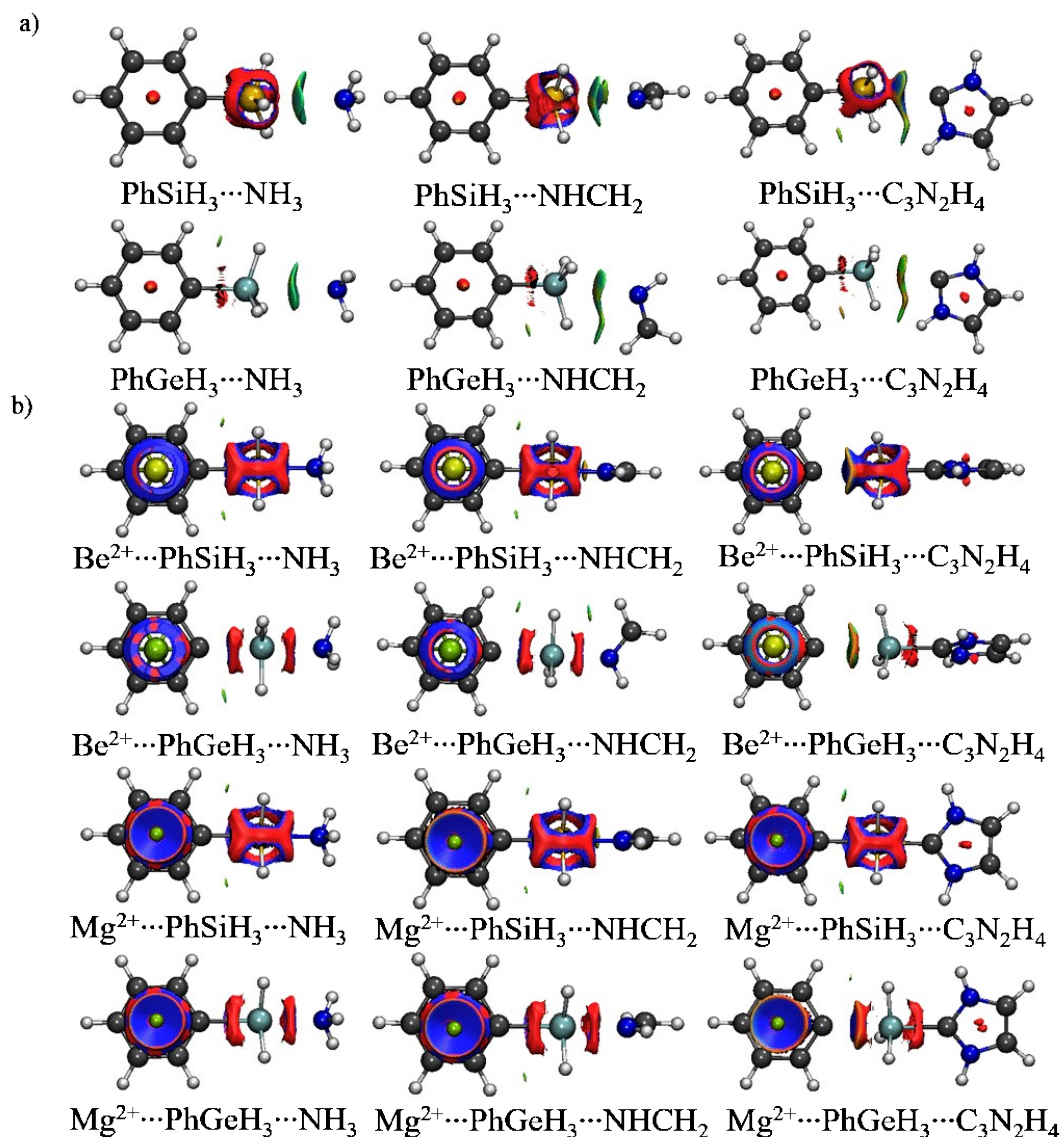

**Figure S2** NCI isosurfaces (iso=0.4 a.u.) of a) binary and b) ternary systems. Blue, green, orange, and red areas represent strong attraction, weak attraction, weak repulsion, and strong repulsion, respectively. Diagrams are drawn by the Multiwfn<sup>[1]</sup> and the VMD programs<sup>[2]</sup>.

[1] T. Lu, F. Chen, Multiwfn: a multifunctional wavefunction analyzer. *J. Comput. Chem.* 2012, **33**, 580-592.

[2] W. Humphrey, A. Dalke, K. Schulten, VMD: visual molecular dynamics. *J. Mol. Graph.* 1996, **14**, 33-38.

### Cartesian coordinates of monomers and complexes

| PhSiH <sub>3</sub>                   |             |             |             |
|--------------------------------------|-------------|-------------|-------------|
| C                                    | -1.64802100 | 1.20612500  | 0.00361200  |
| C                                    | -0.25419300 | 1.20370500  | -0.01118900 |
| C                                    | 0.46671200  | 0.00010300  | -0.01524000 |
| C                                    | -0.25407400 | -1.20363900 | -0.01118400 |
| C                                    | -1.64783400 | -1.20625200 | 0.00361500  |
| C                                    | -2.34658500 | -0.00008300 | 0.01170600  |
| H                                    | -2.18756200 | 2.14453100  | 0.00451600  |
| H                                    | 0.27472300  | 2.15010300  | -0.02500700 |
| H                                    | 0.27484000  | -2.15006800 | -0.02500700 |
| H                                    | -2.18728200 | -2.14471200 | 0.00451500  |
| H                                    | -3.42882300 | -0.00018000 | 0.02068500  |
| Si                                   | 2.34332300  | 0.00002500  | 0.00684000  |
| H                                    | 2.86039600  | -0.01681600 | 1.39589000  |
| H                                    | 2.84632200  | -1.20419600 | -0.69412600 |
| H                                    | 2.84483200  | 1.22124900  | -0.66514500 |
| PhGeH <sub>3</sub>                   |             |             |             |
| C                                    | -2.22457800 | 1.20628100  | -0.00000900 |
| C                                    | -0.82978500 | 1.20118500  | 0.00001600  |
| C                                    | -0.11485300 | -0.00242700 | 0.00001000  |
| C                                    | -0.83422600 | -1.20457800 | 0.00001600  |
| C                                    | -2.22767500 | -1.20499800 | -0.00000500 |
| C                                    | -2.92509300 | 0.00220100  | -0.00001100 |
| H                                    | -2.76162900 | 2.14602100  | -0.00001000 |
| H                                    | -0.29640400 | 2.14478500  | 0.00004100  |
| H                                    | -0.30825800 | -2.15285000 | 0.00003000  |
| H                                    | -2.76785300 | -2.14299600 | -0.00000200 |
| H                                    | -4.00732000 | 0.00348800  | -0.00002700 |
| Ge                                   | 1.81596300  | 0.00014200  | -0.00000400 |
| H                                    | 2.33888400  | -0.71522500 | 1.23236400  |
| H                                    | 2.33890100  | -0.71416400 | -1.23299800 |
| H                                    | 2.29010700  | 1.44041900  | 0.00061100  |
| Be <sup>2+</sup> -PhSiH <sub>3</sub> |             |             |             |
| C                                    | 1.62847500  | -1.22734700 | -0.13281800 |
| C                                    | 0.20744300  | -1.22078300 | -0.09247700 |
| C                                    | -0.54099600 | 0.00024300  | -0.07085800 |
| C                                    | 0.20776200  | 1.22097100  | -0.09248600 |
| C                                    | 1.62881900  | 1.22723000  | -0.13277900 |
| C                                    | 2.34088900  | -0.00017200 | -0.15096800 |
| H                                    | 2.16993400  | -2.16525300 | -0.06611300 |
| H                                    | -0.31212000 | -2.16902700 | 0.00272000  |
| H                                    | -0.31152600 | 2.16937100  | 0.00266900  |

|    |             |             |             |
|----|-------------|-------------|-------------|
| H  | 2.17067300  | 2.16489500  | -0.06591800 |
| H  | 3.42427300  | -0.00037600 | -0.09810300 |
| Si | -2.51393300 | 0.00002000  | -0.02302300 |
| H  | -2.82930000 | -1.24361000 | 0.69449000  |
| H  | -2.82977500 | 1.24339300  | 0.69477000  |
| H  | -2.84319700 | 0.00007800  | -1.45507800 |
| Be | 0.93043800  | -0.00015300 | 1.16179900  |

Be<sup>2+</sup>-PhGeH<sub>3</sub>

|    |             |             |             |
|----|-------------|-------------|-------------|
| C  | -2.21677800 | 1.22703900  | -0.13354200 |
| C  | -0.79577600 | 1.21952000  | -0.09220700 |
| C  | -0.04802700 | -0.00002300 | -0.06842200 |
| C  | -0.79580900 | -1.21954500 | -0.09220400 |
| C  | -2.21681000 | -1.22702400 | -0.13353600 |
| C  | -2.92896300 | 0.00001600  | -0.15094700 |
| H  | -2.75855200 | 2.16466200  | -0.06722200 |
| H  | -0.27669400 | 2.16786100  | 0.00343400  |
| H  | -0.27675800 | -2.16790200 | 0.00342700  |
| H  | -2.75861500 | -2.16463000 | -0.06721300 |
| H  | -4.01227900 | 0.00003100  | -0.09845000 |
| H  | 2.28438900  | -1.27686100 | 0.72456800  |
| H  | 2.30797500  | -0.00032600 | -1.47992000 |
| H  | 2.28432000  | 1.27720500  | 0.72398800  |
| Be | -1.51785700 | 0.00001900  | 1.16091200  |
| Ge | 1.97783200  | 0.00000000  | -0.01128500 |

Mg<sup>2+</sup>-PhSiH<sub>3</sub>

|    |             |             |             |
|----|-------------|-------------|-------------|
| C  | 1.47357200  | -1.22050800 | -0.49542000 |
| C  | 0.06953600  | -1.21434200 | -0.32370500 |
| C  | -0.66912100 | 0.00029300  | -0.23027000 |
| C  | 0.06977400  | 1.21478000  | -0.32322000 |
| C  | 1.47382700  | 1.22069700  | -0.49486400 |
| C  | 2.17912800  | 0.00005300  | -0.57895300 |
| H  | 2.00620400  | -2.16128600 | -0.58188600 |
| H  | -0.45303600 | -2.16504600 | -0.28292300 |
| H  | -0.45263700 | 2.16555100  | -0.28211000 |
| H  | 2.00668000  | 2.16137700  | -0.58101900 |
| H  | 3.25281800  | -0.00005500 | -0.72883100 |
| Si | -2.61322200 | 0.00003400  | -0.06422700 |
| H  | -3.03662300 | -1.24552200 | -0.71843700 |
| H  | -2.85094600 | -0.00670700 | 1.39382600  |
| H  | -3.03605300 | 1.25179300  | -0.70688600 |
| Mg | 0.96403300  | -0.00053500 | 1.50550300  |

Mg<sup>2+</sup>-PhGeH<sub>3</sub>

|   |             |            |             |
|---|-------------|------------|-------------|
| C | -2.01531700 | 1.22035900 | -0.51329000 |
| C | -0.61849300 | 1.21361900 | -0.28954400 |

|    |             |             |             |
|----|-------------|-------------|-------------|
| C  | 0.11639800  | -0.00001800 | -0.17550600 |
| C  | -0.61864800 | -1.21368200 | -0.28966900 |
| C  | -2.01539100 | -1.22020400 | -0.51345800 |
| C  | -2.71676900 | 0.00016300  | -0.62463600 |
| H  | -2.54518500 | 2.16126200  | -0.61320000 |
| H  | -0.09924400 | 2.16440500  | -0.21896800 |
| H  | -0.09946600 | -2.16450200 | -0.21904400 |
| H  | -2.54550800 | -2.16094200 | -0.61371600 |
| H  | -3.78468100 | 0.00006900  | -0.81091700 |
| H  | 2.42499000  | -1.26332400 | 0.72886100  |
| H  | 2.56386400  | -0.00874600 | -1.47104600 |
| H  | 2.42533900  | 1.27182800  | 0.71436500  |
| Ge | 2.11560200  | 0.00001300  | -0.03397800 |
| Mg | -1.56917100 | -0.00015800 | 1.50229800  |

PhSiH<sub>3</sub>...NH<sub>3</sub>

|    |             |             |             |
|----|-------------|-------------|-------------|
| C  | 2.47196700  | -1.20451900 | 0.00442800  |
| C  | 1.07778500  | -1.20168800 | -0.01268400 |
| C  | 0.35195800  | -0.00087700 | -0.01771700 |
| C  | 1.07545200  | 1.20136200  | -0.01267900 |
| C  | 2.46959300  | 1.20691100  | 0.00442200  |
| C  | 3.17045800  | 0.00186800  | 0.01412900  |
| H  | 3.01198200  | -2.14298000 | 0.00596000  |
| H  | 0.54993300  | -2.14916500 | -0.02830700 |
| H  | 0.54584900  | 2.14788000  | -0.02828000 |
| H  | 3.00777900  | 2.14642200  | 0.00593700  |
| H  | 4.25282900  | 0.00293400  | 0.02518800  |
| Si | -1.53421800 | -0.00296300 | 0.00507500  |
| H  | -2.00200500 | 0.00630300  | 1.40950900  |
| H  | -1.99184500 | 1.21879700  | -0.69229100 |
| H  | -1.98839400 | -1.23485200 | -0.67625300 |
| N  | -4.64686700 | 0.00094800  | -0.00064100 |
| H  | -5.02737300 | -0.81996100 | 0.45444500  |
| H  | -5.05508500 | 0.03672600  | -0.92685300 |
| H  | -4.99983500 | 0.80440400  | 0.50499200  |

PhSiH<sub>3</sub>...NHCH<sub>2</sub>

|   |            |             |             |
|---|------------|-------------|-------------|
| C | 2.87358300 | -1.20626700 | -0.12570100 |
| C | 1.48910500 | -1.20147100 | 0.03936100  |
| C | 0.76939900 | 0.00029200  | 0.12101800  |
| C | 1.48999300 | 1.20150300  | 0.03891500  |
| C | 2.87447400 | 1.20520900  | -0.12615400 |
| C | 3.56874900 | -0.00080100 | -0.20971000 |
| H | 3.40920500 | -2.14545000 | -0.18406900 |
| H | 0.96460300 | -2.14825000 | 0.11147100  |
| H | 0.96616200 | 2.14867100  | 0.11069700  |

|    |             |             |             |
|----|-------------|-------------|-------------|
| H  | 3.41080500  | 2.14396500  | -0.18488500 |
| H  | 4.64388100  | -0.00121600 | -0.33531500 |
| Si | -1.10883700 | 0.00109400  | 0.29856000  |
| H  | -1.48914400 | 1.23091000  | 1.02585400  |
| H  | -1.70862100 | -0.00081300 | -1.05700200 |
| H  | -1.48997000 | -1.22623300 | 1.02966400  |
| C  | -4.69286700 | -0.00083600 | -0.74577400 |
| N  | -4.11007300 | 0.00047800  | 0.38984200  |
| H  | -4.79719100 | -0.00331200 | 1.14438100  |
| H  | -5.77392300 | -0.00543200 | -0.88135600 |
| H  | -4.07620300 | 0.00271300  | -1.63990100 |

PhSiH<sub>3</sub>···NHC

|    |             |             |             |
|----|-------------|-------------|-------------|
| C  | 1.99664400  | -0.11750000 | -0.00005900 |
| C  | 2.88440000  | -1.20520300 | 0.00016000  |
| C  | 2.55018900  | 1.17097400  | -0.00026500 |
| C  | 4.26536800  | -1.01683300 | 0.00018200  |
| H  | 2.49511600  | -2.21841000 | 0.00031500  |
| C  | 3.93129700  | 1.37070400  | -0.00024400 |
| H  | 1.89315200  | 2.03425900  | -0.00044700 |
| C  | 4.79195600  | 0.27485700  | -0.00002000 |
| H  | 4.92962500  | -1.87211200 | 0.00035400  |
| H  | 4.33449600  | 2.37581900  | -0.00040600 |
| H  | 5.86405800  | 0.42479500  | -0.00000500 |
| H  | -0.42833000 | 0.99420600  | -0.00059700 |
| H  | -0.21056300 | -1.14422600 | -1.22425600 |
| H  | -0.21070700 | -1.14325200 | 1.22471900  |
| C  | -4.57531300 | 1.06718400  | 0.00013300  |
| C  | -5.08695900 | -0.19649600 | 0.00024700  |
| H  | -5.06600300 | 2.02334300  | 0.00017300  |
| H  | -6.10441200 | -0.54294400 | 0.00041200  |
| N  | -3.99100500 | -1.03485500 | 0.00014100  |
| N  | -3.20594200 | 0.90779400  | -0.00011200 |
| C  | -2.79046900 | -0.38901000 | -0.00007900 |
| H  | -4.04595300 | -2.03882700 | 0.00020000  |
| H  | -2.53818700 | 1.66167200  | -0.00026500 |
| Si | 0.11883300  | -0.38692600 | -0.00005200 |

PhGeH<sub>3</sub>···NH<sub>3</sub>

|   |            |             |             |
|---|------------|-------------|-------------|
| C | 2.84012500 | -1.19386100 | 0.00101500  |
| C | 1.44639100 | -1.20064600 | 0.00007900  |
| C | 0.71592200 | -0.00492600 | -0.00047700 |
| C | 1.42672200 | 1.20130700  | -0.00002800 |
| C | 2.82180800 | 1.21687600  | 0.00090100  |
| C | 3.53065000 | 0.01748600  | 0.00143900  |
| H | 3.38618800 | -2.12867200 | 0.00142300  |

|    |             |             |             |
|----|-------------|-------------|-------------|
| H  | 0.92687300  | -2.15293400 | -0.00022000 |
| H  | 0.88719100  | 2.14185100  | -0.00044500 |
| H  | 3.35289500  | 2.16022800  | 0.00122600  |
| H  | 4.61300600  | 0.02568300  | 0.00217800  |
| N  | -4.44577500 | 0.02799700  | 0.00238600  |
| H  | -4.82512600 | -0.91042200 | -0.03167700 |
| H  | -4.83657600 | 0.52835100  | -0.78666800 |
| H  | -4.82028600 | 0.46278200  | 0.83690400  |
| Ge | -1.22406600 | -0.01530000 | -0.00161800 |
| H  | -1.70638200 | -0.74202500 | 1.23850300  |
| H  | -1.67163800 | 1.43169500  | -0.00066500 |
| H  | -1.70530400 | -0.74033600 | -1.24307400 |

PhGeH<sub>3</sub>···NHCH<sub>2</sub>

|    |             |             |             |
|----|-------------|-------------|-------------|
| C  | -3.27658400 | -0.97242200 | -0.01469100 |
| C  | -1.89425000 | -1.15054800 | -0.01045500 |
| C  | -1.02229800 | -0.05378000 | 0.00144600  |
| C  | -1.57977600 | 1.23046300  | 0.00906200  |
| C  | -2.96232500 | 1.41764700  | 0.00492300  |
| C  | -3.81323200 | 0.31451700  | -0.00695500 |
| H  | -3.93336900 | -1.83305700 | -0.02394500 |
| H  | -1.49564600 | -2.15942900 | -0.01650300 |
| H  | -0.92855500 | 2.09756300  | 0.01835000  |
| H  | -3.37334900 | 2.41918700  | 0.01099400  |
| H  | -4.88637900 | 0.45561700  | -0.01018500 |
| Ge | 0.90212700  | -0.30197000 | 0.00781000  |
| H  | 1.29978700  | -1.06472700 | -1.23957900 |
| H  | 1.50834900  | 1.08743000  | 0.02020500  |
| H  | 1.28946000  | -1.08385400 | 1.24640600  |
| C  | 4.48146800  | 0.88089200  | -0.02721700 |
| N  | 3.99558800  | -0.29884400 | 0.01079300  |
| H  | 4.74501700  | -0.99147200 | 0.01993500  |
| H  | 5.54723000  | 1.10650000  | -0.04701500 |
| H  | 3.79224500  | 1.72056700  | -0.04081200 |

PhGeH<sub>3</sub>···NHC

|   |             |             |             |
|---|-------------|-------------|-------------|
| C | -2.06692400 | -0.06769700 | -0.00001300 |
| C | -2.99567400 | -1.11706700 | -0.00000500 |
| C | -2.55756100 | 1.24347300  | -0.00004100 |
| C | -4.36701900 | -0.86717800 | -0.00002800 |
| H | -2.65039900 | -2.14555600 | 0.00002000  |
| C | -3.92844400 | 1.50305800  | -0.00006500 |
| H | -1.86220800 | 2.07591500  | -0.00004100 |
| C | -4.83606300 | 0.44596900  | -0.00005900 |
| H | -5.06785700 | -1.69250500 | -0.00002100 |
| H | -4.28672200 | 2.52475200  | -0.00008600 |

|                                                             |             |             |             |
|-------------------------------------------------------------|-------------|-------------|-------------|
| H                                                           | -5.90041800 | 0.64290700  | -0.00007600 |
| H                                                           | 0.48953200  | 0.95620900  | 0.00016200  |
| H                                                           | 0.19208900  | -1.19760800 | 1.25057500  |
| H                                                           | 0.19217700  | -1.19736000 | -1.25068100 |
| C                                                           | 4.59435200  | 1.23679200  | -0.00000500 |
| C                                                           | 5.26761000  | 0.05144600  | 0.00002300  |
| H                                                           | 4.95517700  | 2.24915800  | -0.00003600 |
| H                                                           | 6.32176400  | -0.15827300 | 0.00002200  |
| N                                                           | 4.29082800  | -0.92325000 | 0.00005900  |
| N                                                           | 3.25778400  | 0.89841500  | 0.00001400  |
| C                                                           | 3.01345900  | -0.44305400 | 0.00005400  |
| H                                                           | 4.47756800  | -1.91104400 | 0.00008700  |
| H                                                           | 2.49705900  | 1.55825900  | -0.00000100 |
| Ge                                                          | -0.15438900 | -0.42017100 | 0.00001200  |
| Be <sup>2+</sup> ...PhSiH <sub>3</sub> ...NH <sub>3</sub>   |             |             |             |
| C                                                           | 2.35492178  | -1.22856602 | -0.14902208 |
| C                                                           | 0.93401578  | -1.21544802 | -0.06722208 |
| C                                                           | 0.17636878  | 0.00016198  | -0.01991808 |
| C                                                           | 0.93431378  | 1.21555198  | -0.06715808 |
| C                                                           | 2.35521578  | 1.22833198  | -0.14900708 |
| C                                                           | 3.06538278  | -0.00019702 | -0.18348408 |
| H                                                           | 2.90288678  | -2.16267802 | -0.09476808 |
| H                                                           | 0.41601578  | -2.16286002 | 0.04410292  |
| H                                                           | 0.41649578  | 2.16305498  | 0.04425192  |
| H                                                           | 2.90341678  | 2.16230698  | -0.09478708 |
| H                                                           | 4.14855178  | -0.00031502 | -0.15295308 |
| Si                                                          | -1.97807069 | 0.00023450  | 0.00108080  |
| H                                                           | -1.97359169 | -1.28630450 | 0.72495780  |
| H                                                           | -1.97349969 | 1.28471950  | 0.72856080  |
| H                                                           | -1.92029869 | 0.00303550  | -1.47280720 |
| N                                                           | -4.04957108 | -0.00021949 | -0.04441572 |
| H                                                           | -4.42557408 | -0.81550149 | -0.52784172 |
| H                                                           | -4.42646408 | 0.81579051  | -0.52588772 |
| H                                                           | -4.46636608 | -0.00165449 | 0.88604028  |
| Be                                                          | 1.64264900  | -0.00007800 | 1.13758800  |
| Be <sup>2+</sup> ...PhSiH <sub>3</sub> ...NHCH <sub>2</sub> |             |             |             |
| C                                                           | 2.72384249  | -1.22869919 | -0.23027781 |
| C                                                           | 1.31057649  | -1.21552319 | -0.06105981 |
| C                                                           | 0.55728449  | 0.00001081  | 0.03409219  |
| C                                                           | 1.31061749  | 1.21550081  | -0.06125681 |
| C                                                           | 2.72388449  | 1.22860681  | -0.23048081 |
| C                                                           | 3.43056049  | -0.00006419 | -0.30786981 |
| H                                                           | 3.27466149  | -2.16241619 | -0.20946881 |
| H                                                           | 0.79997849  | -2.16250419 | 0.08362819  |



|                                                           |             |             |             |
|-----------------------------------------------------------|-------------|-------------|-------------|
| H                                                         | 0.80004249  | 2.16252081  | 0.08327519  |
| H                                                         | 3.27473849  | 2.16230781  | -0.20982781 |
| H                                                         | 4.51351549  | -0.00009019 | -0.34279781 |
| Si                                                        | -1.59405953 | 0.00008924  | 0.23320497  |
| C                                                         | -4.42872895 | -0.00032804 | -0.66767116 |
| N                                                         | -3.62292995 | 0.00024196  | 0.32618784  |
| H                                                         | -4.08470895 | 0.00083796  | 1.23587384  |
| H                                                         | -5.50336695 | -0.00017504 | -0.52946016 |
| H                                                         | -4.02059395 | -0.00097704 | -1.67167016 |
| H                                                         | -1.51783453 | 1.27761324  | 0.97033097  |
| H                                                         | -1.65514953 | -0.00089176 | -1.24367103 |
| H                                                         | -1.51789453 | -1.27650376 | 0.97194397  |
| Be                                                        | 2.09072200  | 0.00007300  | 1.09683600  |
| Be <sup>2+</sup> ...PhSiH <sub>3</sub> ...NHC             |             |             |             |
| C                                                         | -1.91260748 | -0.00104755 | -0.11236599 |
| C                                                         | -2.65642348 | -1.17453855 | 0.25670101  |
| C                                                         | -2.69342748 | 1.20201245  | -0.21402399 |
| C                                                         | -4.06709648 | -1.17399055 | 0.46468801  |
| H                                                         | -2.14325448 | -2.13000055 | 0.28948401  |
| C                                                         | -4.10461648 | 1.23794545  | -0.01287899 |
| H                                                         | -2.21121048 | 2.11341745  | -0.55128499 |
| C                                                         | -4.78887148 | 0.03774545  | 0.31053801  |
| H                                                         | -4.60921048 | -2.09620355 | 0.63962801  |
| H                                                         | -4.67530248 | 2.14045245  | -0.19936299 |
| H                                                         | -5.87038248 | 0.03109145  | 0.36168701  |
| C                                                         | 4.94084910  | -0.16286580 | -0.48314427 |
| C                                                         | 4.80062010  | 0.22649620  | 0.82204773  |
| H                                                         | 5.82166210  | -0.34699380 | -1.07274627 |
| H                                                         | 5.53711210  | 0.44301220  | 1.57561573  |
| N                                                         | 3.45363410  | 0.30882520  | 1.04812573  |
| N                                                         | 3.67104810  | -0.29521980 | -0.97724727 |
| C                                                         | 2.73070010  | -0.00900780 | -0.04921427 |
| H                                                         | 3.03565110  | 0.57672320  | 1.92900973  |
| H                                                         | 3.45941510  | -0.57302880 | -1.92570927 |
| Be                                                        | -3.48507100 | -0.21541900 | -1.07195000 |
| Si                                                        | 0.77534387  | -0.02851309 | -0.18263674 |
| H                                                         | 0.49010187  | -1.44602209 | -0.46723574 |
| H                                                         | 0.45974887  | 0.44789091  | 1.17766026  |
| H                                                         | 0.52453487  | 0.91131191  | -1.28829774 |
| Be <sup>2+</sup> ...PhGeH <sub>3</sub> ...NH <sub>3</sub> |             |             |             |
| C                                                         | 2.82445524  | -1.22866482 | -0.15183325 |
| C                                                         | 1.40342424  | -1.21429882 | -0.06724625 |
| C                                                         | 0.64518624  | 0.00033318  | -0.01283025 |
| C                                                         | 1.40386624  | 1.21462518  | -0.06730625 |

|    |             |             |             |
|----|-------------|-------------|-------------|
| C  | 2.82493724  | 1.22844118  | -0.15183525 |
| C  | 3.53440124  | -0.00023982 | -0.18568725 |
| H  | 3.37318124  | -2.16239482 | -0.09932425 |
| H  | 0.88830624  | -2.16309682 | 0.04466175  |
| H  | 0.88900124  | 2.16357718  | 0.04446975  |
| H  | 3.37400824  | 2.16197018  | -0.09935225 |
| H  | 4.61757224  | -0.00045882 | -0.15599125 |
| N  | -3.81160345 | 0.00010676  | -0.05055224 |
| H  | -4.18815245 | -0.81778024 | -0.52651624 |
| H  | -4.18787245 | 0.80967776  | -0.54073924 |
| H  | -4.23410745 | 0.00827976  | 0.87591976  |
| Ge | -1.63075280 | -0.00001994 | 0.00382349  |
| H  | -1.64078280 | -1.30808094 | 0.75862349  |
| H  | -1.64024080 | 1.32077106  | 0.73612149  |
| H  | -1.58514080 | -0.01370694 | -1.50492351 |
| Be | 2.10115100  | -0.00001000 | 1.13413700  |

Be<sup>2+</sup>...PhGeH<sub>3</sub>...NHCH<sub>2</sub>

|    |             |             |             |
|----|-------------|-------------|-------------|
| C  | -3.19768976 | -1.10630021 | -0.14572314 |
| C  | -1.77869776 | -1.18520121 | -0.06670114 |
| C  | -0.94123376 | -0.02268821 | -0.01839914 |
| C  | -1.61859976 | 1.23781079  | -0.07671914 |
| C  | -3.03657576 | 1.34584679  | -0.15530414 |
| C  | -3.82531176 | 0.16663179  | -0.18072714 |
| H  | -3.80708476 | -2.00128521 | -0.08878014 |
| H  | -1.32783376 | -2.16640121 | 0.04299586  |
| H  | -1.03967076 | 2.15030179  | 0.02506086  |
| H  | -3.52298276 | 2.31355379  | -0.10565014 |
| H  | -4.90592576 | 0.23766379  | -0.14688014 |
| Ge | 1.33266587  | -0.19545318 | 0.00457538  |
| H  | 1.22734887  | -0.85075018 | -1.35156162 |
| H  | 1.41563987  | 1.31010082  | 0.14026338  |
| H  | 1.28316987  | -1.08612118 | 1.22358338  |
| C  | 4.27150189  | 0.71584639  | -0.00640024 |
| N  | 3.47118889  | -0.27948761 | -0.05491024 |
| H  | 3.94410489  | -1.17923461 | -0.13822224 |
| H  | 5.34730689  | 0.59125739  | -0.05039324 |
| H  | 3.86059889  | 1.71548439  | 0.08100076  |
| Be | -2.39312600 | 0.07711700  | 1.13091300  |

Be<sup>2+</sup>...PhGeH<sub>3</sub>...NHC

|   |             |             |             |
|---|-------------|-------------|-------------|
| C | -2.17094666 | -0.02733248 | -0.13221748 |
| C | -2.91245066 | -1.10472048 | 0.47122052  |
| C | -2.96052066 | 1.14045452  | -0.42924248 |
| C | -4.31867966 | -1.06105048 | 0.70693452  |
| H | -2.40512866 | -2.04202948 | 0.66992252  |

|                                                             |             |             |             |
|-------------------------------------------------------------|-------------|-------------|-------------|
| C                                                           | -4.36745866 | 1.21953552  | -0.20747048 |
| H                                                           | -2.49218866 | 1.97358352  | -0.94077448 |
| C                                                           | -5.04433066 | 0.10157052  | 0.34289752  |
| H                                                           | -4.85745066 | -1.93237548 | 1.06088552  |
| H                                                           | -4.94320866 | 2.07345652  | -0.54532248 |
| H                                                           | -6.12461766 | 0.10694852  | 0.41378552  |
| C                                                           | 4.89634560  | -0.34217122 | -0.34228501 |
| C                                                           | 4.76610060  | 0.49333678  | 0.73420599  |
| H                                                           | 5.77225360  | -0.74179522 | -0.82169201 |
| H                                                           | 5.50765460  | 0.95352978  | 1.36261799  |
| N                                                           | 3.42121260  | 0.67653378  | 0.91054499  |
| N                                                           | 3.62366960  | -0.62189222 | -0.76232601 |
| C                                                           | 2.69628160  | -0.00302022 | -0.00234401 |
| H                                                           | 3.01031760  | 1.25128378  | 1.63385299  |
| H                                                           | 3.40193460  | -1.21827022 | -1.54771001 |
| Ge                                                          | 0.67894472  | -0.04737883 | -0.14695802 |
| H                                                           | 0.30391172  | -1.48199683 | 0.12612598  |
| H                                                           | 0.27750672  | 0.92224117  | 0.93621098  |
| H                                                           | 0.38385872  | 0.41173117  | -1.55114202 |
| Be                                                          | -3.85343600 | -0.40527100 | -0.99160900 |
| Mg <sup>2+</sup> ...PhSiH <sub>3</sub> ...NH <sub>3</sub>   |             |             |             |
| C                                                           | -2.11893208 | 1.22036136  | -0.52386209 |
| C                                                           | -0.72667408 | 1.20886136  | -0.26398709 |
| C                                                           | 0.01846392  | 0.00000536  | -0.12489409 |
| C                                                           | -0.72667608 | -1.20885864 | -0.26397709 |
| C                                                           | -2.11892908 | -1.22035664 | -0.52385709 |
| C                                                           | -2.81812408 | 0.00000336  | -0.64967509 |
| H                                                           | -2.64896208 | 2.15952036  | -0.63683909 |
| H                                                           | -0.20927708 | 2.16016436  | -0.17710909 |
| H                                                           | -0.20929108 | -2.16017064 | -0.17709409 |
| H                                                           | -2.64895808 | -2.15951764 | -0.63683209 |
| H                                                           | -3.88146608 | 0.00000036  | -0.85734409 |
| Si                                                          | 2.10108555  | -0.00001919 | -0.04076906 |
| H                                                           | 2.13937555  | 1.28525981  | 0.69228694  |
| H                                                           | 2.13939455  | -1.28419619 | 0.69421894  |
| H                                                           | 2.14073855  | -0.00121119 | -1.51715206 |
| N                                                           | 4.22425953  | 0.00002383  | -0.04652085 |
| H                                                           | 4.60479553  | 0.81466683  | -0.52578685 |
| H                                                           | 4.60484853  | -0.81529617 | -0.52459085 |
| H                                                           | 4.63056753  | 0.00072583  | 0.88745215  |
| Mg                                                          | -1.64385700 | 0.00000500  | 1.47897900  |
| Mg <sup>2+</sup> ...PhSiH <sub>3</sub> ...NHCH <sub>2</sub> |             |             |             |
| C                                                           | -2.44176958 | 1.22086072  | -0.60019133 |
| C                                                           | -1.06720858 | 1.20896872  | -0.25898533 |

|                                               |             |             |             |
|-----------------------------------------------|-------------|-------------|-------------|
| C                                             | -0.33217258 | -0.00004228 | -0.07408133 |
| C                                             | -1.06741158 | -1.20869828 | -0.26048433 |
| C                                             | -2.44197358 | -1.21992828 | -0.60171333 |
| C                                             | -3.13263858 | 0.00062372  | -0.76614533 |
| H                                             | -2.96470458 | 2.15991672  | -0.74299133 |
| H                                             | -0.55536758 | 2.15974472  | -0.13898233 |
| H                                             | -0.55572458 | -2.15970628 | -0.14165433 |
| H                                             | -2.96506458 | -2.15871928 | -0.74568533 |
| H                                             | -4.18255858 | 0.00087572  | -1.03333533 |
| C                                             | 4.63268728  | 0.00083711  | -0.64112077 |
| N                                             | 3.80997728  | -0.00040989 | 0.33764723  |
| H                                             | 4.25857228  | -0.00146889 | 1.25360423  |
| H                                             | 5.70561428  | 0.00074711  | -0.48936877 |
| H                                             | 4.23895728  | 0.00203511  | -1.65115277 |
| Si                                            | 1.73747030  | -0.00036783 | 0.19226310  |
| H                                             | 1.70038830  | -1.27656683 | 0.94317810  |
| H                                             | 1.90397330  | 0.00126317  | -1.27888990 |
| H                                             | 1.70034230  | 1.27423017  | 0.94589510  |
| Mg                                            | -2.07864500 | -0.00082900 | 1.42870800  |
| Mg <sup>2+</sup> ...PhSiH <sub>3</sub> ...NHC |             |             |             |
| C                                             | 1.44233401  | -0.00042300 | -0.08564608 |
| C                                             | 2.18822101  | -1.20750200 | -0.24325408 |
| C                                             | 2.18809301  | 1.20503000  | -0.25594008 |
| C                                             | 3.57533101  | -1.22310500 | -0.53299308 |
| H                                             | 1.67121601  | -2.15806000 | -0.13883308 |
| C                                             | 3.57516801  | 1.21776600  | -0.54585008 |
| H                                             | 1.67099201  | 2.15659100  | -0.16166808 |
| C                                             | 4.27225801  | -0.00333700 | -0.67428408 |
| H                                             | 4.10525001  | -2.16155000 | -0.65201308 |
| H                                             | 4.10492301  | 2.15497800  | -0.67486608 |
| H                                             | 5.33214401  | -0.00444000 | -0.89735408 |
| Si                                            | -0.77675688 | -0.00035158 | -0.02246957 |
| H                                             | -0.69880188 | 1.31775242  | 0.67037743  |
| H                                             | -0.66563488 | -0.00425958 | -1.50191457 |
| H                                             | -0.69761288 | -1.31478558 | 0.67712043  |
| Mg                                            | 3.09905300  | 0.00750900  | 1.46570800  |
| C                                             | -4.94964314 | 0.68407958  | -0.03507426 |
| C                                             | -4.95019314 | -0.68327142 | -0.03957126 |
| H                                             | -5.76144214 | 1.38894758  | -0.04782026 |
| H                                             | -5.76259214 | -1.38735142 | -0.05699726 |
| N                                             | -3.63162214 | -1.06012842 | -0.00917026 |
| N                                             | -3.63076414 | 1.05960558  | -0.00220126 |
| C                                             | -2.79479014 | -0.00064742 | 0.01154974  |
| H                                             | -3.31176814 | -2.01803642 | -0.00173126 |

|                                                             |             |             |             |
|-------------------------------------------------------------|-------------|-------------|-------------|
| H                                                           | -3.30993914 | 2.01712258  | 0.01168674  |
| Mg <sup>2+</sup> ...PhGeH <sub>3</sub> ...NH <sub>3</sub>   |             |             |             |
| C                                                           | 2.55765391  | -1.22021568 | -0.52307306 |
| C                                                           | 1.16535391  | -1.20808868 | -0.26357906 |
| C                                                           | 0.42182691  | 0.00009432  | -0.12046306 |
| C                                                           | 1.16552891  | 1.20816132  | -0.26362506 |
| C                                                           | 2.55782991  | 1.22006732  | -0.52311706 |
| C                                                           | 3.25687591  | -0.00012868 | -0.64713206 |
| H                                                           | 3.08746191  | -2.15942468 | -0.63642206 |
| H                                                           | 0.64917891  | -2.16018268 | -0.17796906 |
| H                                                           | 0.64951191  | 2.16034432  | -0.17806106 |
| H                                                           | 3.08777491  | 2.15919132  | -0.63649906 |
| H                                                           | 4.32064391  | -0.00020768 | -0.85281906 |
| N                                                           | -4.00946203 | -0.00014801 | -0.02818084 |
| H                                                           | -4.39238203 | -0.80811601 | -0.51407284 |
| H                                                           | -4.39280203 | 0.81688699  | -0.49832384 |
| H                                                           | -4.42105903 | -0.00927301 | 0.90206816  |
| Ge                                                          | -1.74973088 | 0.00007269  | -0.02719011 |
| H                                                           | -1.82530788 | -1.31275731 | 0.72114489  |
| H                                                           | -1.82550688 | 1.31224369  | 0.72226089  |
| H                                                           | -1.83780488 | 0.00072469  | -1.53513611 |
| Mg                                                          | 2.07532100  | 0.00000000  | 1.48246100  |
| Mg <sup>2+</sup> ...PhGeH <sub>3</sub> ...NHCH <sub>2</sub> |             |             |             |
| C                                                           | -2.80858233 | 1.22060714  | -0.61828659 |
| C                                                           | -1.43330733 | 1.20811714  | -0.27955559 |
| C                                                           | -0.69897333 | 0.00002314  | -0.09262759 |
| C                                                           | -1.43341333 | -1.20779286 | -0.28094359 |
| C                                                           | -2.80869433 | -1.21977986 | -0.61968759 |
| C                                                           | -3.49960933 | 0.00053914  | -0.78165159 |
| H                                                           | -3.33160733 | 2.15962814  | -0.76077359 |
| H                                                           | -0.92288633 | 2.15993814  | -0.16160959 |
| H                                                           | -0.92306433 | -2.15978886 | -0.16409259 |
| H                                                           | -3.33180233 | -2.15858886 | -0.76325259 |
| H                                                           | -4.55023233 | 0.00074014  | -1.04617059 |
| C                                                           | 4.45765525  | 0.00079442  | -0.73902067 |
| N                                                           | 3.67387925  | -0.00030358 | 0.26997333  |
| H                                                           | 4.16895525  | -0.00126758 | 1.16149433  |
| H                                                           | 5.53725525  | 0.00068142  | -0.63815367 |
| H                                                           | 4.02611325  | 0.00184942  | -1.73444767 |
| H                                                           | 1.46494708  | -1.30894855 | 0.92323226  |
| H                                                           | 1.64762308  | 0.00141845  | -1.34035774 |
| H                                                           | 1.46494408  | 1.30696345  | 0.92597026  |
| Ge                                                          | 1.46182908  | -0.00019655 | 0.16207726  |
| Mg                                                          | -2.43338200 | -0.00076800 | 1.41169000  |

Mg<sup>2+</sup>...PhGeH<sub>3</sub>...NHC

|    |             |             |             |
|----|-------------|-------------|-------------|
| C  | 1.72706640  | 0.01116954  | 0.02010179  |
| C  | 2.51049240  | 1.22784854  | 0.00735879  |
| C  | 2.45064940  | -1.15279046 | -0.44213121 |
| C  | 3.88708340  | 1.28617954  | -0.38431621 |
| H  | 2.03489340  | 2.16489254  | 0.32541379  |
| C  | 3.82641040  | -1.13126546 | -0.84140021 |
| H  | 1.92537140  | -2.11613246 | -0.48425921 |
| C  | 4.55093940  | 0.09356054  | -0.79134621 |
| H  | 4.43598740  | 2.23419754  | -0.36898621 |
| H  | 4.32819540  | -2.04495546 | -1.17845821 |
| H  | 5.60533540  | 0.12219354  | -1.08280321 |
| C  | -4.99027340 | -0.74813454 | -0.03787879 |
| C  | -5.03721340 | 0.62451946  | -0.19307979 |
| H  | -5.78533140 | -1.48773754 | -0.00049279 |
| H  | -5.88066040 | 1.29848146  | -0.31559779 |
| N  | -3.72447840 | 1.05331246  | -0.16695379 |
| N  | -3.65166040 | -1.06943254 | 0.07319721  |
| C  | -2.84630740 | 0.02572646  | -0.00309479 |
| H  | -3.43865040 | 2.02434046  | -0.26163479 |
| H  | -3.29490840 | -2.01359454 | 0.19579721  |
| Mg | 3.48311300  | -0.29712600 | 1.42815900  |
| H  | -0.62614840 | -1.45300754 | 0.29475221  |
| H  | -0.51996940 | 0.63254646  | -1.31786879 |
| H  | -0.61712740 | 1.01534446  | 1.25960521  |
| Ge | -0.77560540 | 0.05878646  | 0.07649921  |
